# Supplementary material for: β-CsHg2I5, a compound with rare [Hg2I5] dimers and large optical anisotropy
Source: Royal Society of Chemistry journal article supplement (doi:10.1039/d4dt01536c), 2024-01-01
Supplement: d4dt01536c1.pdf [file d4dt01536c1.pdf]

## Supporting Information

### ***$\beta$ -CsHg<sub>2</sub>I<sub>5</sub>*, a compound with rare [Hg<sub>2</sub>I<sub>5</sub>] dimers and large optical anisotropy**

Yingying Kong,<sup>a,b†</sup> Hongshan Wang,<sup>b†</sup> Wang Zhao<sup>b</sup>, Qi Sun<sup>b</sup>, Junjie Li,<sup>b\*</sup> and Shilie Pan<sup>a,b\*</sup>

<sup>a</sup>College of Chemistry, Zhengzhou University, Zhengzhou 450001, China

<sup>b</sup>Research Center for Crystal Materials; State Key Laboratory of Functional Materials and Devices for Special Environmental Conditions; Xinjiang Key Laboratory of Functional Crystal Materials; Xinjiang Technical Institute of Physics and Chemistry, Chinese Academy of Sciences, 40-1 South Beijing Road, Urumqi 830011, China.

<sup>†</sup>These authors contributed equally to this work.

\*Corresponding authors, E-mails: [lijunjie@ms.xjb.ac.cn](mailto:lijunjie@ms.xjb.ac.cn); [slpan@ms.xjb.ac.cn](mailto:slpan@ms.xjb.ac.cn)

**Table S1.** Crystal data and structure refinements of  $\alpha$ -CsHg<sub>2</sub>I<sub>5</sub> and  $\beta$ -CsHg<sub>2</sub>I<sub>5</sub>.

| Empirical formula                                      | $\alpha$ -CsHg <sub>2</sub> I <sub>5</sub>                        | $\beta$ -CsHg <sub>2</sub> I <sub>5</sub>                         |
|--------------------------------------------------------|-------------------------------------------------------------------|-------------------------------------------------------------------|
| Formula weight (Da)                                    | 1168.59                                                           | 1168.59                                                           |
| Temperature/(K)                                        | 100                                                               | 293                                                               |
| Crystal system                                         | monoclinic                                                        | monoclinic                                                        |
| Space group                                            | $P2_1/c$                                                          | $P2_1/c$                                                          |
| $a/(\text{\AA})$                                       | 14.0019(16)                                                       | 8.8094(14)                                                        |
| $b/(\text{\AA})$                                       | 11.4545(14)                                                       | 11.4931(17)                                                       |
| $c/(\text{\AA})$                                       | 19.067(3)                                                         | 14.075(2)                                                         |
| $\alpha/^\circ$                                        | 90                                                                | 90                                                                |
| $\beta/^\circ$                                         | 117.911(4)                                                        | 107.073(6)                                                        |
| $\gamma/^\circ$                                        | 90                                                                | 90                                                                |
| Volume/ $(\text{\AA}^3)$                               | 2702.3(6)                                                         | 1362.3(4)                                                         |
| $Z$                                                    | 8                                                                 | 4                                                                 |
| $\rho_{\text{calc}}(\text{g/cm}^3)$                    | 5.745                                                             | 5.698                                                             |
| $\mu(\text{mm}^{-1})$                                  | 36.718                                                            | 36.418                                                            |
| $F(000)$                                               | 3840                                                              | 1920                                                              |
| Completeness to $\theta$ (%)                           | 99.7                                                              | 94.7                                                              |
| $2\theta$ range for data collection/ $^\circ$          | 4.3 to 55.082                                                     | 4.662 to 54.926                                                   |
| Max. and min. transmission                             | 0.7456 and 0.4780                                                 | 0.7455 and 0.4917                                                 |
| Index ranges                                           | $-18 \leq h \leq 18, -14 \leq k \leq 14,$<br>$-24 \leq l \leq 24$ | $-11 \leq h \leq 10, -14 \leq k \leq 14,$<br>$-17 \leq l \leq 18$ |
| Reflections collected                                  | 71018                                                             | 6897                                                              |
| Independent reflections                                | 6199 [ $R_{\text{int}} = 0.0612, R_{\text{sigma}} =$<br>0.0295]   | 2962 [ $R_{\text{int}} = 0.0646 R_{\text{sigma}} =$<br>0.0833]    |
| Data/restraints/parameters                             | 6199/0/168                                                        | 2962/0/91                                                         |
| Absorpt correction type                                | multi-scan                                                        | multi-scan                                                        |
| Goodness-of-fit on $F^2$                               | 1.081                                                             | 1.055                                                             |
| Final $R$ indexes [ $I \geq 2\sigma(I)$ ] <sup>a</sup> | $R_1 = 0.0218, wR_2 = 0.0438$                                     | $R_1 = 0.0620, wR_2 = 0.1299$                                     |
| Final $R$ indexes [all data] <sup>a</sup>              | $R_1 = 0.0250, wR_2 = 0.0449$                                     | $R_1 = 0.1013, wR_2 = 0.1456$                                     |
| Largest diff. peak/hole/(e. $\text{\AA}^{-3}$ )        | 1.87/-2.29                                                        | 1.992/-2.414                                                      |

<sup>a</sup> $R_1 = \Sigma||F_o| - |F_c||/\Sigma|F_o|$  and  $wR_2 = [\Sigma w(F_o^2 - F_c^2)^2 / \Sigma wF_o^4]^{1/2}$  for  $F_o^2 > 2\sigma(F_o^2)$

**Table S2.** Fractional atomic coordinates ( $\times 10^4$ ) and equivalent isotropic displacement parameters ( $\text{\AA}^2 \times 10^3$ ) and BVS of  $\alpha$ -CsHg<sub>2</sub>I<sub>5</sub>.

| Atoms | x        | y        | z       | U <sub>eq</sub> | Wyckoff positions | BVS <sup>[a]</sup> |
|-------|----------|----------|---------|-----------------|-------------------|--------------------|
| Cs(1) | 6479(1)  | 7454(1)  | 5317(1) | 25(1)           | 4e                | 0.89               |
| Cs(2) | 8494(1)  | 2398(1)  | -257(1) | 30(1)           | 4e                | 0.88               |
| Hg(1) | 4891(7)  | 4131(9)  | 2635(5) | 27(1)           | 4e                | 2.32               |
| Hg(2) | 4960(3)  | 4270(4)  | 2571(3) | 21(1)           | 4e                |                    |
| Hg(3) | 7841(3)  | 6987(2)  | 3341(2) | 22(1)           | 4e                | 2.33               |
| Hg(4) | 7971(7)  | 6771(11) | 3333(3) | 39(1)           | 4e                |                    |
| Hg(5) | 9201(1)  | 10234(1) | 2731(1) | 38(1)           | 4e                | 2.16               |
| Hg(6) | 7245(1)  | 3808(1)  | 1691(1) | 31(1)           | 4e                | 2.17               |
| I(1)  | 2775(1)  | 4444(1)  | 1496(1) | 20(1)           | 4e                | 0.84               |
| I(2)  | 5587(1)  | 4334(1)  | 4151(1) | 19(1)           | 4e                | 1.10               |
| I(3)  | 5762(1)  | 2436(1)  | 2032(1) | 27(1)           | 4e                | 1.13               |
| I(4)  | 5990(1)  | 6085(1)  | 2055(1) | 13(1)           | 4e                | 0.94               |
| I(5)  | 8606(1)  | 6079(1)  | 4803(1) | 17(1)           | 4e                | 1.20               |
| I(6)  | 9134(1)  | 7514(1)  | 2648(1) | 25(1)           | 4e                | 0.93               |
| I(7)  | 10592(1) | 10556(1) | 4215(1) | 20(1)           | 4e                | 1.16               |
| I(8)  | 7714(1)  | 10733(1) | 1299(1) | 18(1)           | 4e                | 1.13               |
| I(9)  | 9016(1)  | 3971(1)  | 3064(1) | 19(1)           | 4e                | 1.01               |
| I(10) | 6355(1)  | 4087(1)  | 138(1)  | 16(1)           | 4e                | 1.21               |

[a] The bond valence sum is calculated by bond-valence theory ( $S_{ij} = \exp[(R_0 - R)/B]$ , where  $R$  is an empirical constant,  $R_0$  is the length of bond I (in angstroms), and  $B = 0.37$ ).

**Table S3.** Fractional atomic coordinates ( $\times 10^4$ ) and equivalent isotropic displacement parameters ( $\text{\AA}^2 \times 10^3$ ) and BVS of  $\beta$ -CsHg<sub>2</sub>I<sub>5</sub>.

| <b>Atoms</b> | <b>x</b> | <b>y</b> | <b>z</b> | <b>U<sub>eq</sub></b> | <b>Wyckoff positions</b> | <b>BVS<sup>[a]</sup></b> |
|--------------|----------|----------|----------|-----------------------|--------------------------|--------------------------|
| Cs(1)        | 10576(2) | 2469(1)  | 8792(1)  | 49(1)                 | 4e                       | 0.84                     |
| Hg(1)        | 4540(2)  | 4750(2)  | 1486(2)  | 65(1)                 | 4e                       | 2.38                     |
| Hg(2)        | 4808(2)  | 4214(2)  | 2311(2)  | 48(1)                 | 4e                       |                          |
| Hg(3)        | 6666(2)  | 3120(3)  | 5453(2)  | 54(1)                 | 4e                       | 2.28                     |
| Hg(4)        | 6612(2)  | 3806(2)  | 5515(2)  | 49(1)                 | 4e                       |                          |
| I(1)         | 1637(1)  | 4389(1)  | 1403(1)  | 36(1)                 | 4e                       | 1.11                     |
| I(2)         | 7219(2)  | 4340(1)  | 1359(1)  | 45(1)                 | 4e                       | 1.07                     |
| I(3)         | 5574(3)  | 2464(1)  | 3620(1)  | 72(1)                 | 4e                       | 1.14                     |
| I(4)         | 4009(1)  | 3949(1)  | 6016(1)  | 32(1)                 | 4e                       | 0.85                     |
| I(5)         | 9656(1)  | 4004(1)  | 6202(1)  | 32(1)                 | 4e                       | 1.19                     |

[a] The bond valence sum is calculated by bond-valence theory ( $S_{ij} = \exp[(R_0 - R)/B]$ , where  $R$  is an empirical constant,  $R_0$  is the length of bond I (in angstroms), and  $B = 0.37$ ).

**Table S4.** Selected bond lengths of  $\alpha$ -CsHg<sub>2</sub>I<sub>5</sub>.

| Atom  | Atom                | Length/Å  | Atom  | Atom               | Length/Å  |
|-------|---------------------|-----------|-------|--------------------|-----------|
| Cs(1) | I(2) <sup>#1</sup>  | 4.0417(7) | Hg(1) | I(2)               | 2.593(9)  |
| Cs(1) | I(2)                | 4.0830(7) | Hg(1) | I(3)               | 2.809(10) |
| Cs(1) | I(3) <sup>#2</sup>  | 4.0929(8) | Hg(1) | I(4)               | 3.193(10) |
| Cs(1) | I(4) <sup>#3</sup>  | 4.0455(7) | Hg(2) | I(1)               | 2.780(4)  |
| Cs(1) | I(5)                | 3.8801(6) | Hg(2) | I(2)               | 2.716(5)  |
| Cs(1) | I(6) <sup>#3</sup>  | 4.2547(8) | Hg(2) | I(3)               | 2.795(5)  |
| Cs(1) | I(7) <sup>#4</sup>  | 4.4039(7) | Hg(2) | I(4)               | 2.950(5)  |
| Cs(1) | I(8) <sup>#3</sup>  | 4.0978(7) | Hg(3) | I(1) <sup>#2</sup> | 3.002(2)  |
| Cs(1) | I(10) <sup>#2</sup> | 4.0950(7) | Hg(3) | I(4)               | 2.802(3)  |
| Cs(1) | I(10) <sup>#3</sup> | 3.9733(7) | Hg(3) | I(5)               | 2.684(3)  |
| Cs(2) | I(1) <sup>#6</sup>  | 4.2291(7) | Hg(3) | I(6)               | 2.762(3)  |
| Cs(2) | I(2) <sup>#7</sup>  | 4.1808(7) | Hg(4) | I(1) <sup>#2</sup> | 3.300(14) |
| Cs(2) | I(5) <sup>#7</sup>  | 3.9853(7) | Hg(4) | I(4)               | 2.814(6)  |
| Cs(2) | I(5) <sup>#5</sup>  | 4.0285(7) | Hg(4) | I(5)               | 2.635(6)  |
| Cs(2) | I(6) <sup>#8</sup>  | 4.5089(9) | Hg(4) | I(6)               | 2.660(7)  |
| Cs(2) | I(7) <sup>#8</sup>  | 4.2309(7) | Hg(5) | I(6)               | 3.1192(6) |
| Cs(2) | I(7) <sup>#5</sup>  | 4.0350(7) | Hg(5) | I(7)               | 2.6036(6) |
| Cs(2) | I(8) <sup>#9</sup>  | 4.0835(7) | Hg(5) | I(8)               | 2.6061(5) |
| Cs(2) | I(9) <sup>#7</sup>  | 3.9283(7) | Hg(6) | I(3)               | 2.9099(5) |
| Cs(2) | I(10)               | 3.9236(6) | Hg(6) | I(9)               | 2.6381(5) |
| Hg(1) | I(1)                | 2.757(9)  | Hg(6) | I(10)              | 2.6402(6) |

<sup>1</sup>1+X,3/2-Y,1/2+Z; <sup>2</sup>2-X,1/2+Y,3/2-Z; <sup>3</sup>+X,3/2-Y,1/2+Z; <sup>4</sup>1-X,1-Y,1-Z; <sup>5</sup>1+X, +Y,1+Z; <sup>6</sup>2-X,1-Y,1-Z; <sup>7</sup>1-X, -1/2+Y,1/2-Z, <sup>8</sup>+X,3/2-Y,-1/2+Z; <sup>9</sup>+X,-1+Y,+Z

**Table S5.** Selected bond lengths of  $\beta$ -CsHg<sub>2</sub>I<sub>5</sub>.

| Atom  | Atom               | Length/Å   | Atom  | Atom               | Length/Å |
|-------|--------------------|------------|-------|--------------------|----------|
| Cs(1) | I(1) <sup>#1</sup> | 4.075(2)   | Hg(1) | I(2)               | 2.465(2) |
| Cs(1) | I(1) <sup>#2</sup> | 4.312(2)   | Hg(1) | I(3) <sup>#7</sup> | 3.122(3) |
| Cs(1) | I(1) <sup>#3</sup> | 4.151(2)   | Hg(2) | I(1)               | 2.716(2) |
| Cs(1) | I(2) <sup>#4</sup> | 4.341(2)   | Hg(2) | I(2)               | 2.829(2) |
| Cs(1) | I(2) <sup>#5</sup> | 4.184(2)   | Hg(2) | I(3)               | 2.677(3) |
| Cs(1) | I(3) <sup>#4</sup> | 4.342(3)   | Hg(3) | I(3)               | 2.588(3) |
| Cs(1) | I(3) <sup>#2</sup> | 4.481(33)  | Hg(3) | I(4)               | 2.847(3) |
| Cs(1) | I(4) <sup>#2</sup> | 4.0057(19) | Hg(3) | I(5)               | 2.729(2) |
| Cs(1) | I(5) <sup>#4</sup> | 4.079(2)   | Hg(4) | I(3)               | 2.984(3) |
| Cs(1) | I(5) <sup>#6</sup> | 3.988(2)   | Hg(4) | I(4)               | 2.594(3) |
| Cs(1) | I(5)               | 3.915(2)   | Hg(4) | I(5)               | 2.580(2) |
| Hg(1) | I(1)               | 2.559(2)   |       |                    |          |

<sup>1</sup>1+X,3/2-Y,1/2+Z; <sup>2</sup>2-X,1/2+Y,3/2-Z; <sup>3</sup>3+X,3/2-Y,1/2+Z; <sup>4</sup>1-X,1-Y,1-Z; <sup>5</sup>1+X, +Y,1+Z; <sup>6</sup>2-X,1-Y,1-Z; <sup>7</sup>1-X, -1/2+Y,1/2-Z

**Table S6.** Selected angles (°) of  $\alpha$ -CsHg<sub>2</sub>I<sub>5</sub>.

| Atom                | Atom  | Atom                | Angle/°     | Atom                | Atom  | Atom                | Angle/°     |
|---------------------|-------|---------------------|-------------|---------------------|-------|---------------------|-------------|
| I(2) <sup>#1</sup>  | Cs(1) | I(2)                | 67.716(13)  | I(10) <sup>#2</sup> | Cs(1) | I(6) <sup>#3</sup>  | 120.244(13) |
| I(2) <sup>#1</sup>  | Cs(1) | I(3) <sup>#2</sup>  | 89.996(14)  | I(10) <sup>#3</sup> | Cs(1) | I(6) <sup>#3</sup>  | 93.602(11)  |
| I(2)                | Cs(1) | I(3) <sup>#2</sup>  | 61.134(11)  | I(10) <sup>#3</sup> | Cs(1) | I(7) <sup>#4</sup>  | 60.017(10)  |
| I(2) <sup>#1</sup>  | Cs(1) | I(4) <sup>#3</sup>  | 65.742(11)  | I(10) <sup>#2</sup> | Cs(1) | I(7) <sup>#4</sup>  | 121.633(15) |
| I(2) <sup>#1</sup>  | Cs(1) | I(6) <sup>#3</sup>  | 96.917(15)  | I(10) <sup>#3</sup> | Cs(1) | I(8) <sup>#3</sup>  | 156.876(15) |
| I(2)                | Cs(1) | I(6) <sup>#3</sup>  | 118.111(13) | I(10) <sup>#2</sup> | Cs(1) | I(8) <sup>#3</sup>  | 131.574(13) |
| I(2) <sup>#1</sup>  | Cs(1) | I(7) <sup>#4</sup>  | 156.884(14) | I(10) <sup>#3</sup> | Cs(1) | I(10) <sup>#2</sup> | 61.782(12)  |
| I(2)                | Cs(1) | I(7) <sup>#4</sup>  | 125.566(13) | I(1) <sup>#6</sup>  | Cs(2) | I(7) <sup>#8</sup>  | 63.287(12)  |
| I(2)                | Cs(1) | I(8) <sup>#3</sup>  | 54.921(12)  | I(2) <sup>#7</sup>  | Cs(2) | I(1) <sup>#6</sup>  | 98.849(14)  |
| I(2) <sup>#1</sup>  | Cs(1) | I(8) <sup>#3</sup>  | 68.423(12)  | I(2) <sup>#7</sup>  | Cs(2) | I(7) <sup>#8</sup>  | 153.550(16) |
| I(2) <sup>#1</sup>  | Cs(1) | I(10) <sup>#2</sup> | 63.174(12)  | I(5) <sup>#7</sup>  | Cs(2) | I(1) <sup>#6</sup>  | 150.600(16) |
| I(2)                | Cs(1) | I(10) <sup>#2</sup> | 105.399(14) | I(5) <sup>#5</sup>  | Cs(2) | I(1) <sup>#6</sup>  | 123.960(13) |
| I(3) <sup>#2</sup>  | Cs(1) | I(6) <sup>#3</sup>  | 172.091(14) | I(5) <sup>#5</sup>  | Cs(2) | I(2) <sup>#7</sup>  | 129.470(14) |
| I(3) <sup>#2</sup>  | Cs(1) | I(7) <sup>#4</sup>  | 112.856(13) | I(5) <sup>#7</sup>  | Cs(2) | I(2) <sup>#7</sup>  | 63.493(11)  |
| I(3) <sup>#2</sup>  | Cs(1) | I(8) <sup>#3</sup>  | 116.037(12) | I(5) <sup>#7</sup>  | Cs(2) | I(5) <sup>#5</sup>  | 66.198(12)  |
| I(3) <sup>#2</sup>  | Cs(1) | I(10) <sup>#2</sup> | 66.422(12)  | I(5) <sup>#5</sup>  | Cs(2) | I(7) <sup>#8</sup>  | 61.110(12)  |
| I(4) <sup>#3</sup>  | Cs(1) | I(2)                | 133.022(13) | I(5) <sup>#7</sup>  | Cs(2) | I(7) <sup>#5</sup>  | 151.932(17) |
| I(4) <sup>#3</sup>  | Cs(1) | I(3) <sup>#2</sup>  | 124.159(15) | I(5) <sup>#7</sup>  | Cs(2) | I(7) <sup>#8</sup>  | 122.533(14) |
| I(4) <sup>#3</sup>  | Cs(1) | I(6) <sup>#3</sup>  | 62.690(13)  | I(5) <sup>#5</sup>  | Cs(2) | I(7) <sup>#5</sup>  | 100.082(14) |
| I(4) <sup>#3</sup>  | Cs(1) | I(7) <sup>#4</sup>  | 96.804(13)  | I(5) <sup>#7</sup>  | Cs(2) | I(8) <sup>#9</sup>  | 62.145(10)  |
| I(4) <sup>#3</sup>  | Cs(1) | I(8) <sup>#3</sup>  | 101.026(14) | I(5) <sup>#5</sup>  | Cs(2) | I(8) <sup>#9</sup>  | 104.723(14) |
| I(4) <sup>#3</sup>  | Cs(1) | I(10) <sup>#2</sup> | 57.737(10)  | I(7) <sup>#5</sup>  | Cs(2) | I(1) <sup>#6</sup>  | 57.451(12)  |
| I(5)                | Cs(1) | I(2) <sup>#1</sup>  | 125.587(14) | I(7) <sup>#5</sup>  | Cs(2) | I(2) <sup>#7</sup>  | 127.073(13) |
| I(5)                | Cs(1) | I(2)                | 65.307(12)  | I(7) <sup>#5</sup>  | Cs(2) | I(7) <sup>#8</sup>  | 61.644(12)  |
| I(5)                | Cs(1) | I(3) <sup>#2</sup>  | 90.421(15)  | I(7) <sup>#5</sup>  | Cs(2) | I(8) <sup>#9</sup>  | 101.079(15) |
| I(5)                | Cs(1) | I(4) <sup>#3</sup>  | 144.992(15) | I(8) <sup>#9</sup>  | Cs(2) | I(1) <sup>#6</sup>  | 128.313(14) |
| I(5)                | Cs(1) | I(6) <sup>#3</sup>  | 82.441(15)  | I(8) <sup>#9</sup>  | Cs(2) | I(2) <sup>#7</sup>  | 54.305(11)  |
| I(5)                | Cs(1) | I(7) <sup>#4</sup>  | 60.576(12)  | I(8) <sup>#9</sup>  | Cs(2) | I(7) <sup>#8</sup>  | 152.050(16) |
| I(5)                | Cs(1) | I(8) <sup>#3</sup>  | 62.880(11)  | I(9) <sup>#7</sup>  | Cs(2) | I(1) <sup>#6</sup>  | 94.372(15)  |
| I(5)                | Cs(1) | I(10) <sup>#3</sup> | 113.014(13) | I(9) <sup>#7</sup>  | Cs(2) | I(2) <sup>#7</sup>  | 96.858(13)  |
| I(5)                | Cs(1) | I(10) <sup>#2</sup> | 156.101(15) | I(9) <sup>#7</sup>  | Cs(2) | I(5) <sup>#5</sup>  | 58.124(11)  |
| I(6) <sup>#3</sup>  | Cs(1) | I(7) <sup>#4</sup>  | 60.555(11)  | I(9) <sup>#7</sup>  | Cs(2) | I(5) <sup>#7</sup>  | 66.692(11)  |
| I(8) <sup>#3</sup>  | Cs(1) | I(6) <sup>#3</sup>  | 63.567(10)  | I(9) <sup>#7</sup>  | Cs(2) | I(7) <sup>#8</sup>  | 67.209(12)  |
| I(8) <sup>#3</sup>  | Cs(1) | I(7) <sup>#4</sup>  | 102.411(14) | I(9) <sup>#7</sup>  | Cs(2) | I(7) <sup>#5</sup>  | 128.449(14) |
| I(10) <sup>#3</sup> | Cs(1) | I(2)                | 146.709(15) | I(9) <sup>#7</sup>  | Cs(2) | I(8) <sup>#9</sup>  | 128.370(15) |
| I(10) <sup>#3</sup> | Cs(1) | I(2) <sup>#1</sup>  | 121.286(13) | I(10)               | Cs(2) | I(1) <sup>#6</sup>  | 61.750(11)  |
| I(10) <sup>#3</sup> | Cs(1) | I(3) <sup>#2</sup>  | 86.031(11)  | I(10)               | Cs(2) | I(2) <sup>#7</sup>  | 63.367(13)  |
| I(10) <sup>#3</sup> | Cs(1) | I(4) <sup>#3</sup>  | 68.927(10)  | I(10)               | Cs(2) | I(5) <sup>#7</sup>  | 120.713(14) |

|       |       |                    |             |       |       |                    |             |
|-------|-------|--------------------|-------------|-------|-------|--------------------|-------------|
| I(10) | Cs(2) | I(5) <sup>#5</sup> | 157.970(16) | I(5)  | Hg(3) | I(1) <sup>#2</sup> | 104.50(9)   |
| I(10) | Cs(2) | I(7) <sup>#5</sup> | 63.791(12)  | I(5)  | Hg(3) | I(4)               | 121.47(11)  |
| I(10) | Cs(2) | I(7) <sup>#8</sup> | 116.744(14) | I(5)  | Hg(3) | I(6)               | 123.33(11)  |
| I(10) | Cs(2) | I(8) <sup>#9</sup> | 66.596(12)  | I(6)  | Hg(3) | I(1) <sup>#2</sup> | 97.42(8)    |
| I(10) | Cs(2) | I(9) <sup>#7</sup> | 143.450(16) | I(6)  | Hg(3) | I(4)               | 101.90(10)  |
| I(1)  | Hg(1) | I(3)               | 106.3(3)    | I(4)  | Hg(4) | I(1) <sup>#2</sup> | 96.7(3)     |
| I(1)  | Hg(1) | I(4)               | 98.7(3)     | I(5)  | Hg(4) | I(1) <sup>#2</sup> | 98.0(3)     |
| I(2)  | Hg(1) | I(1)               | 124.8(4)    | I(5)  | Hg(4) | I(4)               | 122.8(2)    |
| I(2)  | Hg(1) | I(3)               | 120.6(3)    | I(5)  | Hg(4) | I(6)               | 129.7(3)    |
| I(2)  | Hg(1) | I(4)               | 109.4(3)    | I(6)  | Hg(4) | I(1) <sup>#2</sup> | 92.7(3)     |
| I(3)  | Hg(1) | I(4)               | 88.3(3)     | I(6)  | Hg(4) | I(4)               | 104.2(2)    |
| I(1)  | Hg(2) | I(3)               | 106.03(15)  | I(7)  | Hg(5) | I(6)               | 100.710(15) |
| I(1)  | Hg(2) | I(4)               | 104.15(14)  | I(7)  | Hg(5) | I(8)               | 158.745(19) |
| I(2)  | Hg(2) | I(1)               | 119.27(18)  | I(8)  | Hg(5) | I(6)               | 100.097(16) |
| I(2)  | Hg(2) | I(3)               | 116.83(16)  | I(9)  | Hg(6) | I(3)               | 104.727(18) |
| I(2)  | Hg(2) | I(4)               | 113.33(15)  | I(9)  | Hg(6) | I(10)              | 146.669(18) |
| I(3)  | Hg(2) | I(4)               | 93.64(14)   | I(10) | Hg(6) | I(3)               | 107.713(17) |
| I(4)  | Hg(3) | I(1) <sup>#2</sup> | 104.10(9)   |       |       |                    |             |

<sup>1</sup>1+X,3/2-Y,1/2+Z; <sup>2</sup>2-X,1/2+Y,3/2-Z; <sup>3</sup>3+X,3/2-Y,1/2+Z; <sup>4</sup>1-X,1-Y,1-Z; <sup>5</sup>1+X, +Y,1+Z; <sup>6</sup>2-X,1-Y,1-Z; <sup>7</sup>1-X, -1/2+Y,1/2-Z; <sup>8</sup>3+X,3/2-Y,-1/2+Z; <sup>9</sup>3+X,-1+Y,+Z



Table S7. Selected angles (°) of  $\beta$ -CsHg<sub>2</sub>I<sub>5</sub>.

| Atom               | Atom  | Atom               | Angle/°   | Atom               | Atom  | Atom               | Angle/°    |
|--------------------|-------|--------------------|-----------|--------------------|-------|--------------------|------------|
| I(1) <sup>#1</sup> | Cs(1) | I(1) <sup>#3</sup> | 64.37(4)  | I(5) <sup>#6</sup> | Cs(1) | I(2) <sup>#4</sup> | 60.00(3)   |
| I(1) <sup>#3</sup> | Cs(1) | I(1) <sup>#2</sup> | 155.46(5) | I(5) <sup>#6</sup> | Cs(1) | I(2) <sup>#5</sup> | 154.18(5)  |
| I(1) <sup>#1</sup> | Cs(1) | I(1) <sup>#2</sup> | 126.55(4) | I(5)               | Cs(1) | I(2) <sup>#4</sup> | 64.82(4)   |
| I(1) <sup>#3</sup> | Cs(1) | I(2) <sup>#5</sup> | 65.91(4)  | I(5) <sup>#4</sup> | Cs(1) | I(2) <sup>#4</sup> | 101.62(4)  |
| I(1) <sup>#3</sup> | Cs(1) | I(2) <sup>#4</sup> | 151.31(5) | I(5) <sup>#6</sup> | Cs(1) | I(3) <sup>#4</sup> | 88.06(4)   |
| I(1) <sup>#2</sup> | Cs(1) | I(2) <sup>#4</sup> | 53.20(3)  | I(5)               | Cs(1) | I(3) <sup>#4</sup> | 90.62(4)   |
| I(1) <sup>#1</sup> | Cs(1) | I(2) <sup>#5</sup> | 55.94(4)  | I(5) <sup>#4</sup> | Cs(1) | I(3) <sup>#4</sup> | 66.91(4)   |
| I(1) <sup>#1</sup> | Cs(1) | I(2) <sup>#4</sup> | 99.78(4)  | I(5)               | Cs(1) | I(4) <sup>#2</sup> | 144.44(5)  |
| I(1) <sup>#3</sup> | Cs(1) | I(3) <sup>#4</sup> | 90.07(4)  | I(5) <sup>#6</sup> | Cs(1) | I(4) <sup>#2</sup> | 67.62(3)   |
| I(1) <sup>#1</sup> | Cs(1) | I(3) <sup>#4</sup> | 61.50(3)  | I(5)               | Cs(1) | I(5) <sup>#6</sup> | 117.10(4)  |
| I(1) <sup>#2</sup> | Cs(1) | I(3) <sup>#4</sup> | 114.47(4) | I(5)               | Cs(1) | I(5) <sup>#4</sup> | 157.52(6)  |
| I(1) <sup>#1</sup> | Cs(1) | I(5) <sup>#4</sup> | 102.47(5) | I(5) <sup>#6</sup> | Cs(1) | I(5) <sup>#4</sup> | 63.94(4)   |
| I(2) <sup>#5</sup> | Cs(1) | I(1) <sup>#2</sup> | 100.62(5) | I(1)               | Hg(1) | I(3) <sup>#7</sup> | 98.19(9)   |
| I(2) <sup>#5</sup> | Cs(1) | I(2) <sup>#4</sup> | 126.77(4) | I(2)               | Hg(1) | I(1)               | 158.60(12) |
| I(2) <sup>#5</sup> | Cs(1) | I(3) <sup>#4</sup> | 117.40(4) | I(2)               | Hg(1) | I(3) <sup>#7</sup> | 101.86(9)  |
| I(2) <sup>#4</sup> | Cs(1) | I(3) <sup>#4</sup> | 61.28(4)  | I(1)               | Hg(2) | I(2)               | 125.77(9)  |
| I(4) <sup>#2</sup> | Cs(1) | I(1) <sup>#3</sup> | 66.55(3)  | I(1)               | Hg(2) | I(4) <sup>#1</sup> | 112.12(8)  |
| I(4) <sup>#2</sup> | Cs(1) | I(1) <sup>#1</sup> | 130.52(5) | I(2)               | Hg(2) | I(4) <sup>#1</sup> | 101.11(6)  |
| I(4) <sup>#2</sup> | Cs(1) | I(1) <sup>#2</sup> | 96.96(4)  | I(3)               | Hg(2) | I(1)               | 113.33(9)  |
| I(4) <sup>#2</sup> | Cs(1) | I(2) <sup>#4</sup> | 127.20(4) | I(3)               | Hg(2) | I(2)               | 106.96(8)  |
| I(4) <sup>#2</sup> | Cs(1) | I(2) <sup>#5</sup> | 98.11(4)  | I(3)               | Hg(2) | I(4) <sup>#1</sup> | 91.65(7)   |
| I(4) <sup>#2</sup> | Cs(1) | I(3) <sup>#4</sup> | 124.88(5) | I(3)               | Hg(3) | I(2) <sup>#4</sup> | 96.45(9)   |
| I(4) <sup>#2</sup> | Cs(1) | I(5) <sup>#4</sup> | 58.00(3)  | I(3)               | Hg(3) | I(4)               | 106.24(9)  |
| I(5) <sup>#6</sup> | Cs(1) | I(1) <sup>#1</sup> | 149.48(5) | I(3)               | Hg(3) | I(5)               | 121.86(11) |
| I(5)               | Cs(1) | I(1) <sup>#2</sup> | 61.96(4)  | I(4)               | Hg(3) | I(2) <sup>#4</sup> | 103.58(9)  |
| I(5)               | Cs(1) | I(1) <sup>#1</sup> | 64.78(4)  | I(5)               | Hg(3) | I(2) <sup>#4</sup> | 99.47(8)   |
| I(5) <sup>#6</sup> | Cs(1) | I(1) <sup>#3</sup> | 121.81(4) | I(5)               | Hg(3) | I(4)               | 123.17(10) |
| I(5)               | Cs(1) | I(1) <sup>#3</sup> | 121.08(5) | I(3)               | Hg(4) | I(4) <sup>#1</sup> | 82.64(7)   |
| I(5) <sup>#4</sup> | Cs(1) | I(1) <sup>#2</sup> | 125.76(4) | I(4)               | Hg(4) | I(3)               | 102.27(8)  |
| I(5) <sup>#4</sup> | Cs(1) | I(1) <sup>#3</sup> | 62.14(4)  | I(4)               | Hg(4) | I(4) <sup>#1</sup> | 97.91(8)   |
| I(5) <sup>#6</sup> | Cs(1) | I(1) <sup>#2</sup> | 61.98(3)  | I(5)               | Hg(4) | I(3)               | 113.12(11) |
| I(5)               | Cs(1) | I(2) <sup>#5</sup> | 61.97(4)  | I(5)               | Hg(4) | I(4) <sup>#1</sup> | 97.47(8)   |
| I(5) <sup>#4</sup> | Cs(1) | I(2) <sup>#5</sup> | 127.92(5) | I(5)               | Hg(4) | I(4)               | 142.85(12) |

<sup>1</sup>1+X,3/2-Y,1/2+Z; <sup>2</sup>2-X,1/2+Y,3/2-Z; <sup>3</sup>3+X,3/2-Y,1/2+Z; <sup>4</sup>1-X,1-Y,1-Z; <sup>5</sup>1+X, +Y,1+Z; <sup>6</sup>2-X,1-Y,1-Z; <sup>7</sup>1-X, -1/2+Y,1/2-Z

**Table S8.** Anisotropic displacement parameters ( $\text{\AA}^2 \times 10^3$ ) for  $\alpha$ -CsHg<sub>2</sub>I<sub>5</sub>. The anisotropic displacement factor exponent takes the form:  $-2\pi^2[h^2a^2U_{11}+2hka*b*U_{12}+\dots]$

| <b>Atom</b> | <b>U11</b> | <b>U22</b> | <b>U33</b> | <b>U23</b> | <b>U13</b> | <b>U12</b> |
|-------------|------------|------------|------------|------------|------------|------------|
| Cs(1)       | 28(1)      | 17(1)      | 33(1)      | -2(1)      | 17(1)      | 3(1)       |
| Cs(2)       | 35(1)      | 17(1)      | 52(1)      | -3(1)      | 31(1)      | 0(1)       |
| Hg(1)       | 37(2)      | 32(2)      | 14(1)      | 3(1)       | 14(1)      | 2(1)       |
| Hg(2)       | 25(1)      | 24(1)      | 13(1)      | 2(1)       | 9(1)       | -1(1)      |
| Hg(3)       | 23(1)      | 26(1)      | 15(1)      | 2(1)       | 7(1)       | -3(1)      |
| Hg(4)       | 30(2)      | 68(3)      | 16(1)      | 6(2)       | 8(1)       | -14(2)     |
| Hg(5)       | 32(1)      | 50(1)      | 16(1)      | 3(1)       | -2(1)      | -3(1)      |
| Hg(6)       | 25(1)      | 46(1)      | 16(1)      | 5(1)       | 5(1)       | -4(1)      |
| I(1)        | 18(1)      | 16(1)      | 20(1)      | 5(1)       | 5(1)       | -3(1)      |
| I(2)        | 23(1)      | 15(1)      | 14(1)      | 1(1)       | 4(1)       | -2(1)      |
| I(3)        | 38(1)      | 11(1)      | 46(1)      | -2(1)      | 33(1)      | -3(1)      |
| I(4)        | 14(1)      | 10(1)      | 14(1)      | -1(1)      | 7(1)       | 0(1)       |
| I(5)        | 19(1)      | 14(1)      | 16(1)      | 1(1)       | 7(1)       | 1(1)       |
| I(6)        | 30(1)      | 16(1)      | 41(1)      | -2(1)      | 26(1)      | 0(1)       |
| I(7)        | 20(1)      | 19(1)      | 15(1)      | 1(1)       | 4(1)       | -1(1)      |
| I(8)        | 20(1)      | 17(1)      | 14(1)      | 0(1)       | 4(1)       | 3(1)       |
| I(9)        | 19(1)      | 20(1)      | 16(1)      | -2(1)      | 5(1)       | 6(1)       |
| I(10)       | 17(1)      | 15(1)      | 15(1)      | 0(1)       | 7(1)       | 2(1)       |

**Table S9.** Anisotropic displacement parameters ( $\text{\AA}^2 \times 10^3$ ) for  $\beta$ -CsHg<sub>2</sub>I<sub>5</sub>. The anisotropic displacement factor exponent takes the form:  $-2\pi^2[h^2a^*2U_{11}+2hka^*b^*U_{12}+\dots]$ .

| <b>Atom</b> | <b>U11</b> | <b>U22</b> | <b>U33</b> | <b>U23</b> | <b>U13</b> | <b>U12</b> |
|-------------|------------|------------|------------|------------|------------|------------|
| Cs(1)       | 65(1)      | 38(1)      | 42(1)      | 10(1)      | 12(1)      | 6(1)       |
| Hg(1)       | 25(1)      | 84(2)      | 90(2)      | 0(1)       | 21(1)      | 3(1)       |
| Hg(2)       | 24(1)      | 60(1)      | 57(1)      | 10(1)      | 5(1)       | 4(1)       |
| Hg(3)       | 25(1)      | 75(2)      | 57(1)      | -24(1)     | 7(1)       | -8(1)      |
| Hg(4)       | 23(1)      | 62(1)      | 61(1)      | -9(1)      | 9(1)       | -8(1)      |
| I(1)        | 23(1)      | 35(1)      | 50(1)      | -4(1)      | 10(1)      | -3(1)      |
| I(2)        | 50(1)      | 41(1)      | 50(1)      | -17(1)     | 24(1)      | -19(1)     |
| I(3)        | 147(2)     | 25(1)      | 53(1)      | -6(1)      | 43(1)      | -7(1)      |
| I(4)        | 32(1)      | 28(1)      | 37(1)      | 4(1)       | 12(1)      | -1(1)      |
| I(5)        | 25(1)      | 36(1)      | 34(1)      | 3(1)       | 5(1)       | 4(1)       |

**Table S10.** Atomic occupancy for  $\alpha$ -CsHg<sub>2</sub>I<sub>5</sub>.

| <b>Atom</b> | <b>Occupancy</b> | <b>Atom</b> | <b>Occupancy</b> |
|-------------|------------------|-------------|------------------|
| Hg(1)       | 0.5              | Hg(3)       | 0.5              |
| Hg(2)       | 0.5              | Hg(4)       | 0.5              |

**Table S11.** Atomic occupancy for  $\beta$ -CsHg<sub>2</sub>I<sub>5</sub>.

| <b>Atom</b> | <b>Occupancy</b> | <b>Atom</b> | <b>Occupancy</b> |
|-------------|------------------|-------------|------------------|
| Hg(1)       | 0.5              | Hg(3)       | 0.5              |
| Hg(2)       | 0.5              | Hg(4)       | 0.5              |

**Table S12.** Cs, Hg and I elements in  $\beta$ -CsHg<sub>2</sub>I<sub>5</sub> with an atomic ratio.

| Element | Wt%    | Wt% Sigma | Atomic % |
|---------|--------|-----------|----------|
| Cs      | 12.82  | 0.22      | 13.95    |
| Hg      | 31.64  | 0.22      | 22.80    |
| I       | 55.54  | 0.23      | 63.26    |
| Total   | 100.00 |           | 100.00   |

**Table S13.** Bulk modulus of  $\beta$ -CsHg<sub>2</sub>I<sub>5</sub>

| Element      | Voigt   | Reuss   | Hill    |
|--------------|---------|---------|---------|
| Bulk modulus | 9.89422 | 7.99758 | 8.94950 |

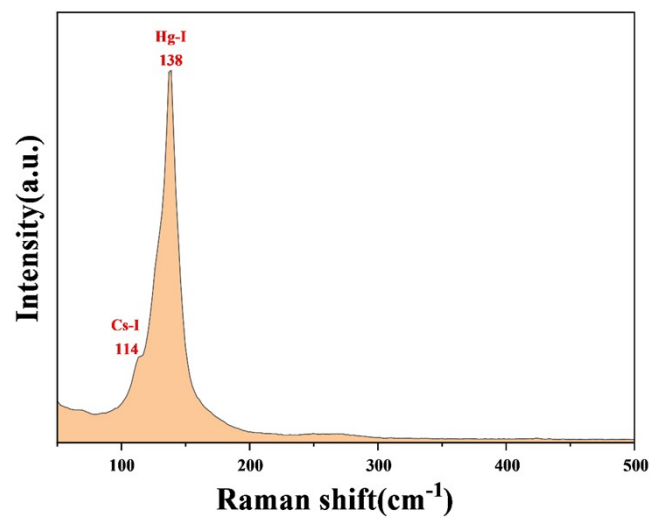

**Figure S1.** Raman spectrum of  $\beta$ -CsHg<sub>2</sub>I<sub>5</sub>.



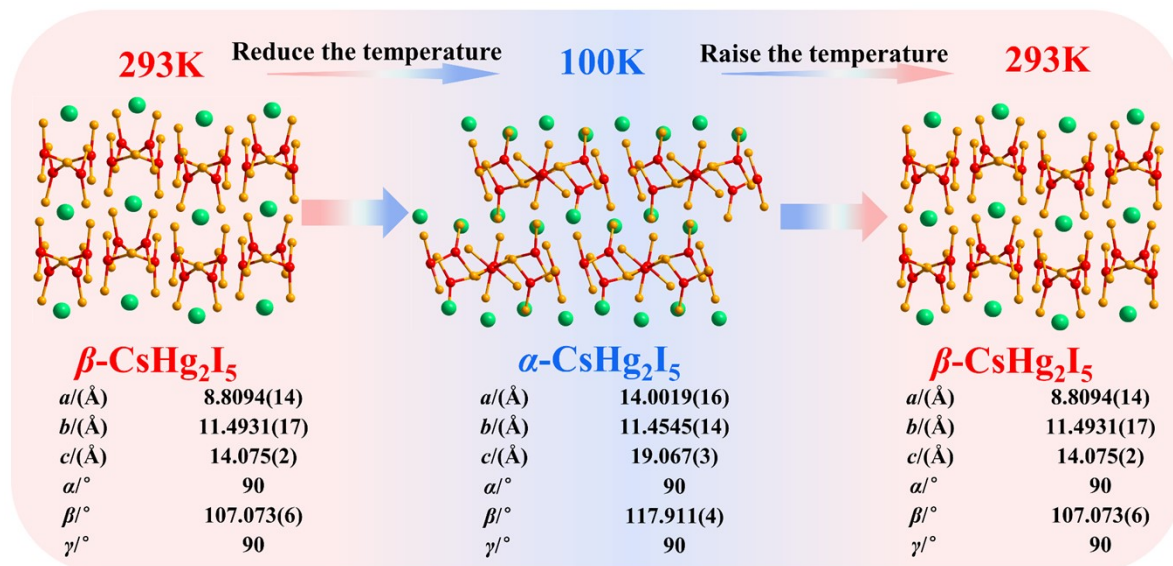

**Figure S2.** Reversible phase transition process.

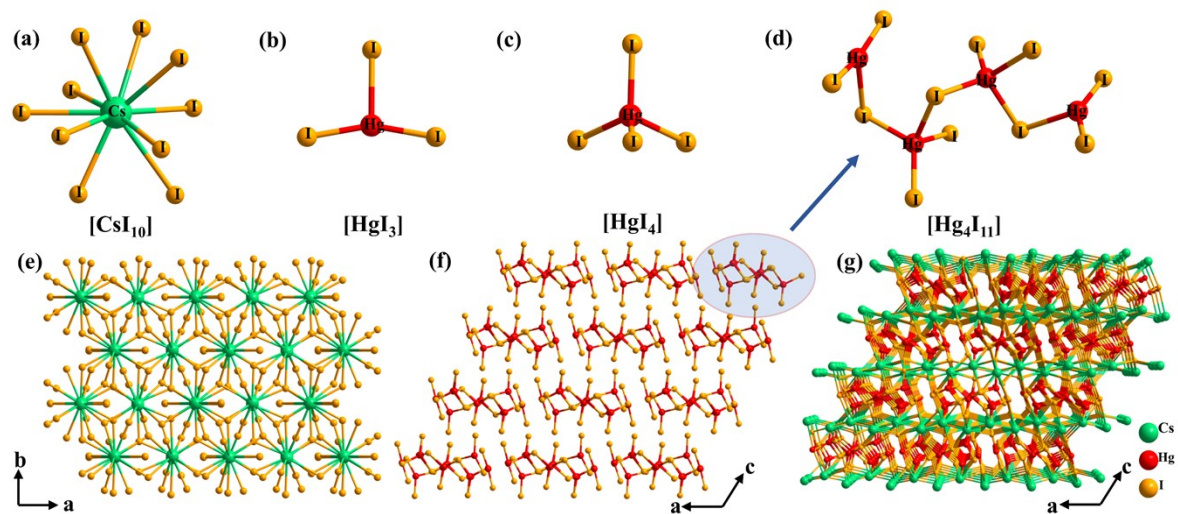

**Figure S3.** (a – c) Coordination modes of Cs and Hg; (d) The formed [Hg<sub>4</sub>I<sub>11</sub>] multimer; (e) The structure of Cs-I framework; (f) The resulted [Hg<sub>4</sub>I<sub>11</sub>] pseudo-layer; (g) The 3D crystal structure of  $\alpha$ -CsHg<sub>2</sub>I<sub>5</sub>.

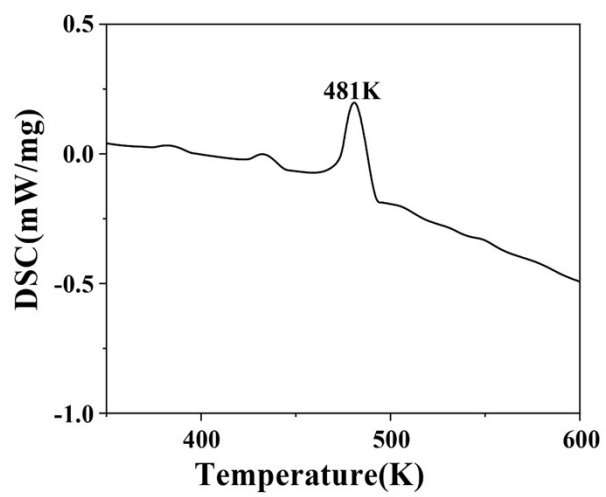

**Figure S4.** The DSC curve of  $\beta$ -CsHg<sub>2</sub>I<sub>5</sub>.

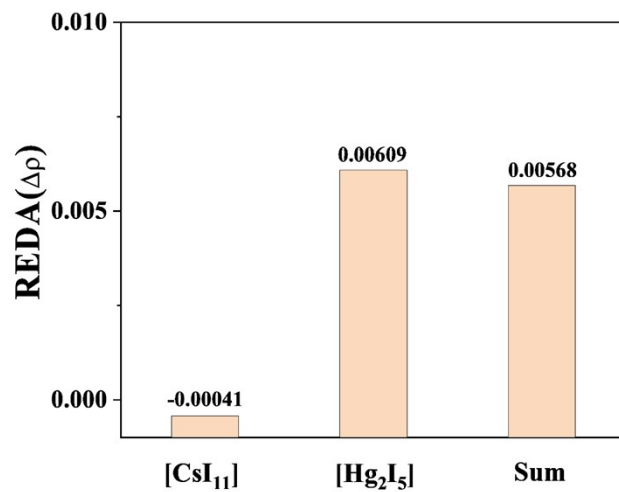

**Figure S5.** Bonding electron density difference ( $\Delta\rho$ ) of each tiny units in  $\beta$ -CsHg<sub>2</sub>I<sub>5</sub>.

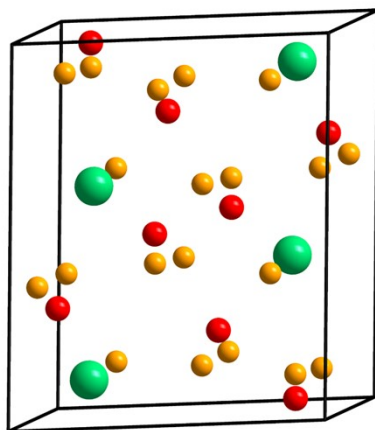

$a = 8.8644(7)$   
 $b = 11.5984(7)$   
 $c = 14.1921(10)$   
 $\alpha = 90^\circ$   
 $\beta = 107.522(3)^\circ$   
 $\gamma = 90^\circ$

**Figure S6.** The optimized structure model and unit-cell parameters of  $\beta$ -CsHg<sub>2</sub>I<sub>5</sub>.
